# Supplementary material for: Tuning the porous structure of carbon hosts for loading sulfur toward long lifespan cathode materials for Li–S batteries
Source: Royal Society of Chemistry journal article supplement (doi:10.1039/c3ta10735c), 2013-01-01
Supplement: c3ta10735c.pdf [file c3ta10735c.pdf]

## Electronic Supplementary Information for

### Tuning porous structure of carbon matrixes for loading sulfur toward long lifespan cathode materials of Li-S batteries

Huan Ye, Ya-Xia Yin, Sen Xin and Yu-Guo Guo\*

CAS Key Laboratory of Molecular Nanostructure and Nanotechnology, and Beijing National Laboratory for Molecular Sciences (BNLMS), Institute of Chemistry, Chinese Academy of Sciences (CAS), Beijing, 100190, P.R. China

\*Correspondence author. E-mail: [ygguo@iccas.ac.cn](mailto:ygguo@iccas.ac.cn)

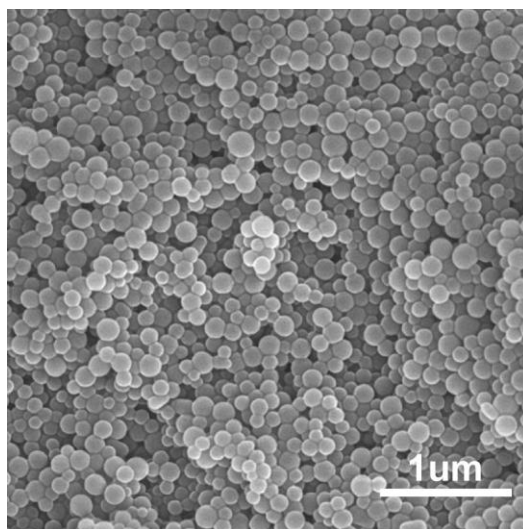

**Figure S1.** SEM image of carbon precursor spheres.

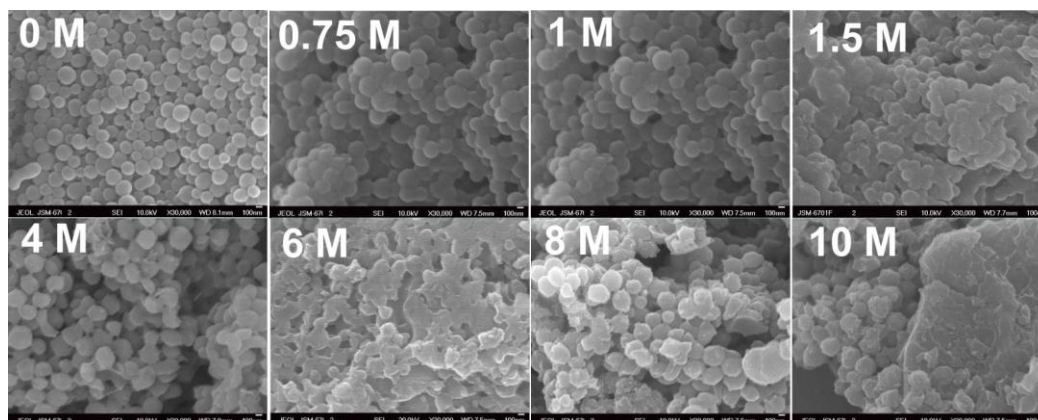

**Figure S2.** SEM images of MPCs activated at different KOH concentrations.

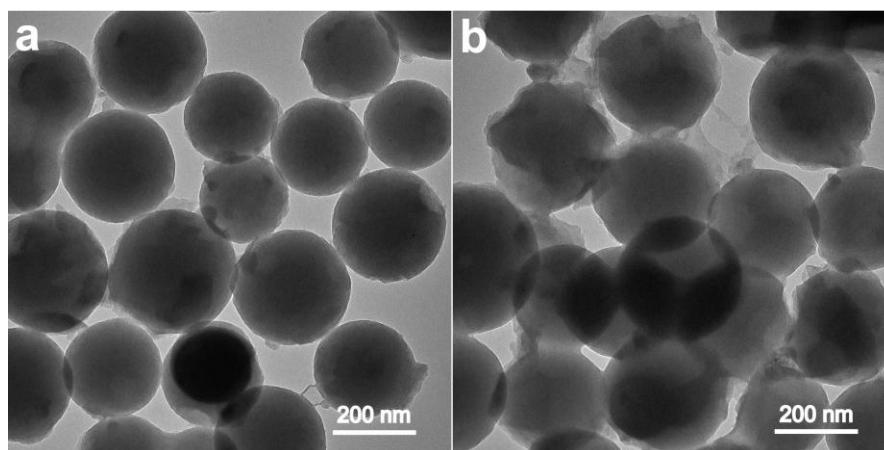

**Figure S3.** TEM images of (a) non-activated MPCS and (b) MPCS activated with 1 M KOH.

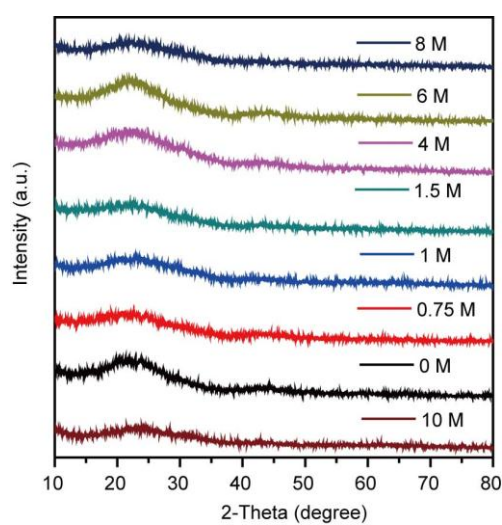

**Figure S4.** X-ray diffraction patterns of MPCSs activated with various concentration of KOH.

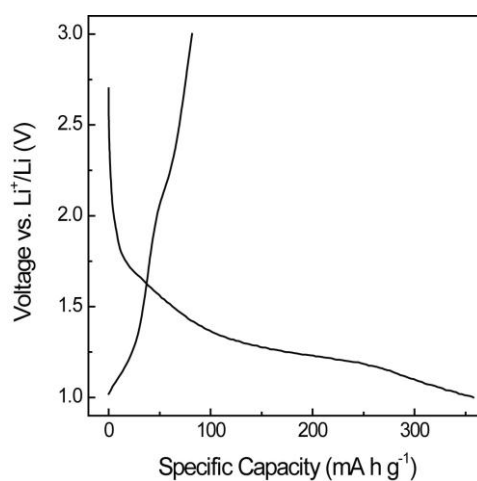

**Figure S5.** The discharge-charge curve of bare MPCS activated with 1 M KOH in the first cycle.

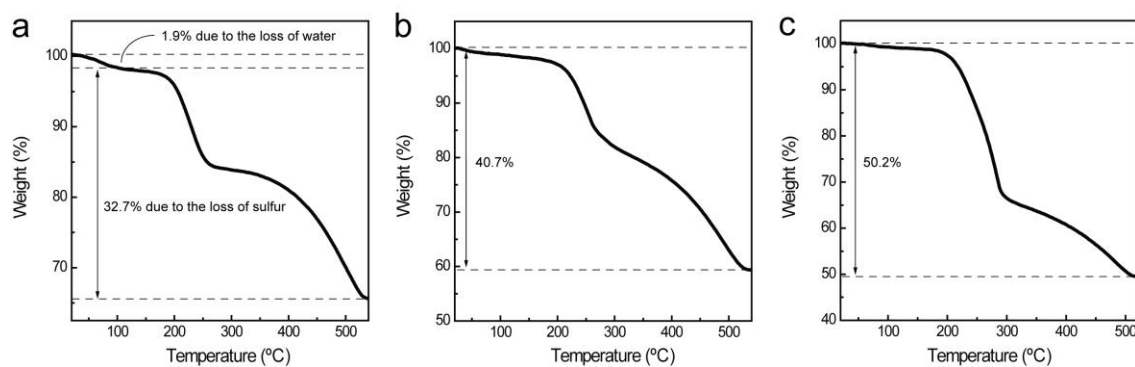

**Figure S6.** TG curve of (a)  $S_{33.3}/MPCS$ , (b)  $S_{40}/MPCS$ , and (c)  $S_{50}/MPCS$ .

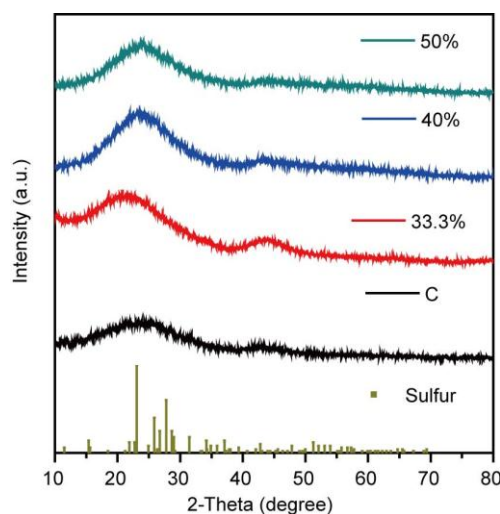

**Figure S7.** X-ray diffraction patterns of MPCs activated with 1 M KOH,  $S_{33.3}/MPCS$ ,  $S_{40}/MPCS$ ,  $S_{50}/MPCS$ , and standard card of sulfur (JCPDS Card No. 08-0247).

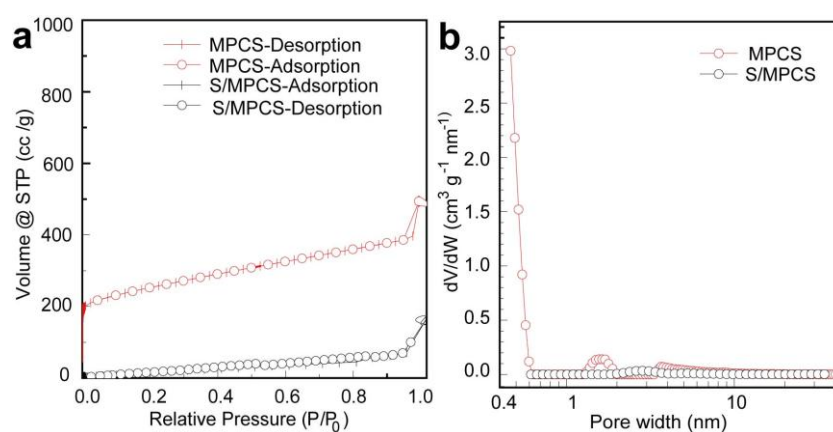

**Figure S8.** (a) Nitrogen adsorption/desorption isotherms at 77K and (b) Pore size distribution of MPCs and  $S_{40}/MPCS$  activated with 1 M KOH.

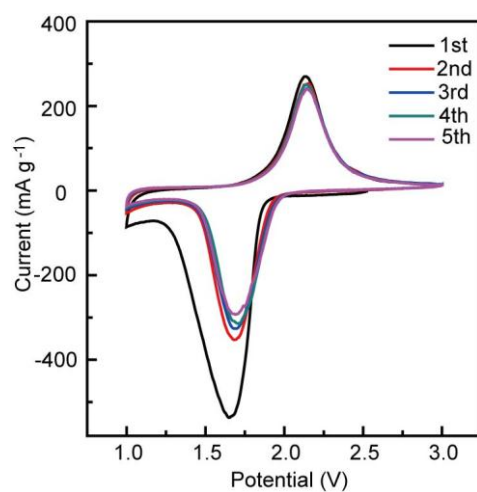

**Figure S9.** The first five cycling voltammograms of S<sub>40</sub>/MPCS obtained in carbonate-based electrolyte at a scan rate of 0.05 mV s<sup>-1</sup>.
